# Supplementary material for: High- and low-temperature pyrolysis profiles describe volatile organic compound emissions from western US wildfire fuels
Source: Copernicus journal article supplement (doi:10.5194/acp-2018-52), 2018-02-19
Supplement: Supplementary file 1 [file Tables for SI_20180212.xlsx]

## Sheet: Table S2
Table S2. Fractions of individual ion peaks in the VOC emission profiles of the high- and low-temperature pyrolysis factors (Figure 3).
Exact mass (m/z)	Chemical formula (ion)	Compound	Comment of compound	High-temp factor (ncps VOC/ncps total VOC) a	Standard deviation of high-temp factor (ncps VOC/ncps total VOC)	Low-temp factor (ncps VOC/ncps total VOC) a	Standard deviation of low-temp factor (ncps VOC/ncps total VOC)	High-temp factor (ppbv VOC/ppbv total VOC) b	Low-temp factor (ppbv VOC/ppbv total VOC) b
11.9995	C			7.30063e-06		2.15994e-07
13.0073	CH			9.5099e-06		2.79208e-08
14.0025	N
14.0151	CH2			4.42229e-05	1.31951e-05	2.45777e-05	1.84636e-05
15.0104	NH
15.0229	CH3			0.000869398	0.000183402	0.0010562	0.000271532
17.026	NH3			3.38717e-05	0.000109543	0.00221445	0.00116525
18.0338	NH4	Ammonia	ammonia	0.00432276	0.00396465	0.0241398	0.0138982	0.0293795	0.18328
26.0151	C2H2	acetylene	acetylene (fragments on this mass subtracted)	0.00122992	0.000285306	0.000466839	0.000108183	0.0392847	0.0166577
27.0229	C2H3			0.000242393	4.4162e-05	0.00013653	3.7728e-05
28.0182	HCNH	Hydrogencyanide	HCN	0.00710128	0.00352201	0.000987227	0.00108217	0.0255459	0.00396736
28.0308	C2H4	ethene	ethene (fragments on this mass subtracted)	0.00096074	0.000277215	0.000333741	0.000165058	0.0594707	0.0230784
29.9974	NO			0.0789234	0.050811	0.000992811	0.00197363
30.0338	CH3NH	Methanimine	Methanimine
31.0178	CH2OH	Formaldehyde	Formaldehyde	0.0269108	0.00589573	0.0144308	0.00363105	0.159042	0.0952744
33.0335	CH4OH	Methanol	Methanol	0.0534429	0.0124318	0.0795577	0.0160942	0.0568965	0.0946186
34.995	H3S	Hydrogensulfide	H2S	3.03582e-05	1.89574e-05	5.90017e-07	1.03602e-06	0.000103599	2.24928e-06
38.0151	C3H2
39.0229	C3H3			0.00905294	0.00208007	0.00530173	0.00102479
41.0386	C3H5	noID	no ID	0.0295153	0.00716257	0.0181382	0.0031028	0.00440994	0.00302746
42.01	C2HOH			0.00136425	0.000490968	0.000295396	0.000184035
42.0338	C2H3NH	Acetonitrile	Acetonitrile	0.0106712	0.00462103	0.00729158	0.00518206	0.00428381	0.00326993
43.0178	C2H2OH			0.0878629	0.016908	0.08185	0.0158236
43.0542	C3H6H	Propene	propene (fragments on this mass subtracted)	0.0135708	0.00411075	0.00884584	0.00190178	0.0288131	0.0209809
44.0131	HNCOH	IsocyanicAcid	Isocyanic acid	0.0150358	0.0124388	0.00234817	0.00163669	0.0546731	0.00953846
44.0495	C2H5NH	Etheneamine	Etheneamine	0.00045624	0.000321197	0.00031733	0.000281294	0.000328113	0.000254942
45.0335	C2H4OH	Acetaldehyde	Acetaldehyde	0.0903739	0.0114462	0.0664351	0.0118397	0.0452585	0.0371668
45.9924	NO2			0.00114722	0.00087306	0.000299788	0.000375673
46.0287	CH3NOH	Formamide	Formamide	0.000428661	0.000229595	0.000355178	0.000257796	0.000397372	0.000367815
46.0651	C2H7NH	Ethylamine	Ethylamine
47.0128	CH2O2H	FormicAcid	Formic acid	0.00920478	0.0039009	0.00546887	0.00232035	0.0141836	0.00941394
47.0491	C2H6OH	Ethanol	ethanol	0.000174817	0.000187173	6.05095e-06	1.09334e-05	0.00493955	0.000190997
48.008	HNO2H	HONO	HONO	0.000436431	0.000267448	1.95932e-05	2.35604e-05	0.0553688	0.00277687
48.984	CClHH
49.0106	CH4SH	Methanethiol	methane thiol	0.000592517	0.000230331	0.00029451	0.000218405	0.00038975	0.000216414
49.0284	CH4O2H	Methanediol	Methanediol	4.51984e-05	1.7685e-05	1.39546e-05	1.73307e-05	2.73491e-05	9.43273e-06
50.0151	C4HH
51.0229	C4H2H			0.000225917	4.46594e-05	5.98431e-07	7.31407e-07
51.0441	CH6O2H			0.000350111	7.88844e-05	0.00053605	0.000135992
52.0182	C3HNH	Propynenitrile	Propiolonitrile (=propyne nitrile)	0.000316566	0.000124344	9.22783e-07	1.59389e-06	0.000109028	3.55038e-07
52.0308	C4H4			8.03284e-05	3.10371e-05	4.38727e-06	1.71469e-06
53.0022	C3OH			8.08601e-05	1.45871e-05	1.65457e-05	1.26057e-05
53.0386	C4H4H	1Buten3yne	1-Buten-3-yne (fragments on this mass subtracted)	0.00364012	0.000840365	0.00159447	0.000260937	0.00277726	0.001359
54.0338	C3H3NH	Acrylonitrile	acrylonitrile	0.00443448	0.00223207	0.00064281	0.000299878	0.00146127	0.000236631
55.0178	C3H2OH	2-propynal	2-propynal	0.00312916	0.000633242	0.00180196	0.000519401	0.00136976	0.000881172
55.0542	C4H6H	13Butadiene	1,3-butadiene (82%), 1,2-butadiene (1%), other fragments on this mass subtracted	0.0160476	0.00513271	0.00794667	0.00194797	0.0133156	0.00736603
56.0257	C3H4O
56.0495	C3H5NH	Propanenitrile	Propanenitrile	0.00152793	0.000721802	0.000444233	0.000226384	0.000561867	0.000182491
57.0335	C3H4OH	Acrolein	Acrolein	0.0410672	0.00540173	0.0251358	0.00695072	0.0403528	0.0275913
57.0699	C4H9	butenes	butenes (59%), general hydrocarbon (34%), other fragments on this mass subtracted	0.00903029	0.00306066	0.00671217	0.00194173	0.00668316	0.00554936
58.0287	C2H3NOH	Methylisocyanate	methyl isocyanate 50%, hydroxy acetonitrile 50% (estimate)	0.000450543	0.000131487	0.000225303	8.8799e-05	0.000526626	0.000294193
58.0413	C3H6O			6.18641e-12	5.0565e-12	8.48325e-05	0.000119971
58.0651	C3H7NH	Propeneamine	Propene amine	1.9323e-05	2.65307e-05	0.000213306	7.64629e-05	1.37372e-05	0.000169405
59.0128	C2H2O2H	Glyoxal	glyoxal	0.000159278	7.42561e-05	0.000102899	0.000191618	0.0121243	0.00875008
59.0491	C3H6OH	Acetone	acetone (>99%), propanal (<1%)	0.0267743	0.00625804	0.0282887	0.00511985	0.0114229	0.0134825
59.0855	C4H10H			0.000554382	0.000341988	0.000265371	0.000235381
60.0206	C2H3O2H			7.8168e-05	1.8704e-05	0.000168789	3.825e-05
60.0444	C2H5NOH	Acetamide	acetamide	0.000873546	0.000342462	0.0013372	0.000697859	0.000817892	0.00139864
60.0808	C3H9NH	Trimethylamine	trimethyl amine, other C3 amines	3.27577e-11	2.97954e-11	0.000220105	0.000200875	2.53099e-11	0.00018998
60.9743	COSH	noID	no ID	1.93388e-07		0.000519342		1.02445e-07	0.000307337
61.0284	C2H4O2H	AceticAcid	acetic acid (67%), glycolaldehyde (33%) (estimate)	0.124107	0.0358065	0.132833	0.0366912	0.0864128	0.10332
61.0648	C3H8OH		propanol, but overlap issue with acetic acid	0.00311699	0.00283042	0.00229486	0.00211082
62.0237	CH3NO2H	Nitromethane	nitromethane	0.00580991	0.00176769	0.000231057	0.000428527	0.00478628	0.000212641
63.0263	C2H6SH	Dimethylsulfide	Dimethyl sulfide	2.45229e-11		4.04573e-11		1.58133e-11	2.91438e-11
63.0441	C2H6O2H			0.000536072	0.000105808	0.00038979	0.000237447
63.9852	HNOSH	noID	no ID
64.0029	HNO3H
65.0233	CH4O3H			8.47403e-05	3.31187e-05	7.23294e-06	8.1061e-06
65.0386	C5H4H			0.000162839	6.89724e-05	0.000115075	5.01175e-05
65.0597	C2H8O2H
66.0338	C4H3NH	Butynenitrile	3-butynenitrile, 2-butynenitrile, cyanoallene	6.62018e-05	5.17274e-06	1.97814e-11	9.87235e-12	2.26953e-05	7.57571e-12
66.0464	C5H5H			0.000125454	5.13678e-05	2.54339e-05	1.3755e-05
67.039	CH7O3			0.000192468	7.23638e-05	1.09033e-05	1.34285e-05
67.0542	C5H6H	13Cyclopentadiene	1,3-cyclopentadiene (22%), isoprene fragment subtracted (78%)	0.00573882	0.00233792	0.00183975	0.000454421	0.00113065	0.000404914
68.0257	C4H3OH			0.000184515	4.13706e-05	0.000218014	4.56978e-05
68.0495	C4H5NH	Butenenitriles_Pyrrole	butenenitrile isomers (43%), pyrrole (57%)	0.0030571	0.00131228	0.00115933	0.000741056	0.0021798	0.000923454
68.9971	C3O2H	Carbonsuboxide	carbon suboxide	0.000306601	0.000103879	7.8982e-07	1.76583e-06	0.000176043	5.06609e-07
69.0335	C4H4OH	Furan	furan	0.00963551	0.00348632	0.0193815	0.00363586	0.00706607	0.0158778
69.0699	C5H8H	Isoprene	Isoprene (63%), other fragments on this mass subtracted	0.00874588	0.0044157	0.00343041	0.00102683	0.00689375	0.00302063
70.0287	C3H3NOH	noID	no ID	0.000150583	3.5684e-05	6.70127e-05	4.6921e-05	5.83266e-05	2.89966e-05
70.0413	C4H6O	noID	no ID	0.000106636	2.51315e-05	9.27315e-06	1.31141e-05	6.58815e-05	6.4001e-06
70.0651	C4H7NH	Butanenitrile_dihydropyrrole	butanenitriles (61%), dihydropyrrole (39%)	0.000646936	0.000246433	0.000398857	0.000250896	0.000377362	0.000259904
71.0128	C3H2O2H	Propiolicacid	Propiolic acid	0.000234404	0.000106268	0.000410462	0.000179428	0.000167634	0.000327922
71.0491	C4H6OH	MVK_MACR_CA	MVK (48%), methacrolein (19%), crotonaldehyde (33%)	0.018607	0.00443723	0.0138041	0.00210703	0.0111348	0.00922817
71.0855	C5H10H	Pentene_methylbutene	pentenes+methylbutenes (69%), other fragments on this mass subtracted	0.00109896	0.000518244	0.000961184	0.000436124	0.000565119	0.000552158
72.0444	C3H5NOH			0.000274585	9.17258e-05	0.000190088	0.000126468
72.0808	C4H9NH	Buteneamines_tetrahydropyrrole	butene amines (~50%), tetrahydropyrrole (~50%)	7.11763e-06	1.42352e-05	6.37542e-05	5.32192e-05	4.77414e-06	4.77715e-05
73.0284	C3H4O2H	Methylglyoxal_Acrylicacid	methyl glyoxal (~50%), acrylic acid (~50%)	0.0135435	0.00231652	0.00935765	0.00340769	0.00867887	0.00669884
73.0648	C4H8OH	MEK	MEK (85%), 2-methylpropanal (14%), butanal (1%)	0.00409701	0.00130626	0.00613139	0.0013902	0.00189024	0.00316015
74.0111	CH2N2O2	noID	no ID	4.31212e-12		5.90781e-11		2.26871e-12	3.47227e-11
74.0237	C2H3NO2H	Nitroethene	nitroethene	0.000202617	5.30514e-05	2.84283e-06	5.43313e-06	7.33743e-05	1.15006e-06
74.0349	CH3N3OH	noID	no ID
74.06	C3H7NOH	noID	no ID	0.000185905	8.62172e-05	0.00035239	0.000161278	7.16798e-05	0.000151785
75.0441	C3H6O2H	hydroxyacetone_methylacetate	hydroxyacetone (~50%), methyl acetate (35%), ethyl formate (14%)	0.022593	0.00676282	0.0280997	0.00444412	0.0132966	0.0184743
76.0393	C2H5NO2H	Nitroethane	nitroethane
77.0022	C5HO	noID	no ID
77.0233	C2H4O3H	noID	no ID
77.0597	C3H8O2H	noID	no ID	0.000205432	3.26798e-05	0.000266863	8.03083e-05	0.000116903	0.000169647
78.0008	CH3NOSH	sulfinylmethanamine	n-sulfinylmethanamine
78.0338	C5H3NH	noID	no ID	6.83114e-05	1.09279e-05	1.91909e-07	3.83585e-07	3.55787e-05	1.11659e-07
78.0464	C6H6			0.00046836	0.000221067	7.10405e-05	4.94711e-05
78.0913	C3H11NOH	noID	no ID	2.30351e-05		1.42837e-10		8.84047e-06	6.12387e-11
79.039	C2H6O3H			0.00199805	0.000508245	0.00168067	0.000376516
79.0542	C6H6H	Benzene	benzene (90%) (fragments on this mass subtracted)	0.0194507	0.00826151	0.00513135	0.00220876	0.0134031	0.00395004
80.0131	C4HONH	noID	no ID
80.0403	CH8N2S	noID	no ID	6.98088e-07		1.12291e-11		3.66533e-07	6.5864e-12
80.0495	C5H5NH	Pentylnitrile_Pyridine	pyridine(44%), nitriles (56%)	0.00126673	0.000472256	0.00108111	0.000518136	0.00052216	0.00049784
81.0335	C5H4OH	Cyclopentadienone	2,4-Cyclopentadiene-1-one (42%), other HCO2 (58%)	0.00627022	0.00127888	0.00764153	0.00138488	0.00325591	0.0044327
81.0546	C2H8O3H			0.000496742		5.22555e-12
81.0699	C6H8H	noID	no ID	0.0104177	0.0083642	0.00270604	0.00123992	0.00117558	0.000341127
82.0287	C4H3NOH	noID	no ID	0.000103915	2.02121e-05	6.09002e-06	5.27699e-06	3.96955e-05	2.59885e-06
82.0413	C5H5OH	noID	no ID	8.80053e-05	5.87814e-05	0.000183819	6.00429e-05	5.32762e-05	0.000124312
82.0651	C5H7NH	Methylpyrrole	methylpyrrole (33%), pentenenitriles (97%)	0.000984298	0.000443325	0.000715537	0.000427293	0.000392304	0.000318587
83.0128	C4H2O2H	noID	no ID	3.29833e-05		0.00027113		1.86768e-05	0.000171509
83.0491	C5H6OH	MethylFuran	2-methyl furan (51%), 3-methylfuran (10%), general HCO (37%)	0.00878146	0.00293918	0.0138413	0.00226914	0.00592304	0.0104293
83.0855	C6H10H	noID	no ID	0.00240824	0.000823691	0.00146188	0.000632595	0.00168104	0.00113996
84.0206	C4H3O2H
84.0444	C4H5NOH	noID	no ID	0.000327323	0.000134348	0.000372608	0.00017033	0.000124749	0.00015864
84.0808	C5H9NH	Pentanenitriles	Pentanenitriles	0.000432995	0.000176098	0.00019406	0.000184949	0.000143428	7.18103e-05
85.0106	C4H4SH	Thiophene	thiofuran (=thiophene)	0.000352484	8.35833e-05	0.000133505	9.24354e-05	0.000262536	0.000111083
85.0284	C4H4O2H	Furanone	2-(3H)-furanone, other fragments on this mass subtracted	0.0133179	0.00430655	0.0178418	0.00588648	0.00715696	0.0107111
85.0648	C5H8OH	3methyl3Buten2one	3-methyl-3-butene-2-one (37%), cyclopentanone (18%), HCO1 (45%)	0.00486972	0.00161983	0.00555978	0.00129437	0.00249418	0.00318112
85.1012	C6H12H	noID	no ID	0.000619808	0.00017616	0.000516633	0.000267535	0.000428296	0.000398812
86.0237	C3H3NO2H	noID	no ID	6.35588e-05	1.96532e-05	7.48389e-05	3.46458e-05	2.41681e-05	3.17902e-05
86.06	C4H7NOH			0.000157549	7.87318e-05	0.00059781	0.000325989	5.8134e-05	0.000246421
86.0964	C5H11NH	noID	no ID	9.01833e-07	1.27538e-06	4.56925e-05	6.4186e-05	4.68577e-07	2.65216e-05
87.0077	C3H2O3H	noID	no ID	0.000107279	5.10196e-05	0.000205349	9.12348e-05	5.29273e-05	0.000113177
87.0441	C4H6O2H	23Butanedione	2,3-butanedione (87%), methyl acrylate (5%), other (8%)	0.0134862	0.00466717	0.0185821	0.00307772	0.00918153	0.0141325
87.0804	C5H10OH	3methyl2butanone	3-methyl-2-butanone (43%), 2-methylbutanal+3-methylbutanal (4%), 2-pentanone (32%), 3-pentanone (21%)	0.000635537	0.000387531	0.00114871	0.000627142	0.000423379	0.000854866
87.1168	C6H14H	noID	no ID	0.000140954	0.000105936	0.000179788	8.48812e-05	9.64408e-05	0.000137418
88.0393	C3H6NO2	noID	no ID
88.0757	C4H9NOH	noID	no ID	2.89098e-05	3.30794e-05	0.000135448	6.46948e-05	1.0968e-05	5.74057e-05
89.0233	C3H4O3H	Pyruvicacid	pyruvic acid	0.00042562	0.000164988	0.000250643	0.00024754	0.000209538	0.000137847
89.0597	C4H8O2H	Methylpropanoate	Methyl propanoate	0.00179992	0.000617144	0.00378607	0.00061884	0.00117909	0.00277066
90.0186	C2H3NO3H	noID	no ID	6.03587e-05	2.96284e-05	9.56835e-05	8.09038e-05	3.15925e-05	5.59474e-05
90.055	C3H7NO2H	Nitropropanes	nitropropanes	2.49962e-11		3.87081e-05		9.27377e-12	1.60429e-05
90.0913	C4H11NOH	noID	no ID
91.0026	C2H2O4H	noID	no ID
91.039	C3H6O3H	noID	no ID	0.000601981	0.000153163	0.000710893	0.000319082	0.000295768	0.000390187
91.0542	C7H6H	noID	no ID	0.00139286	0.000508363			0.000934835
91.0754	C4H10O2H
92.0495	C6H6N	Ethynylpyrrole	ethynylpyrrole	0.000112162	1.78148e-05	2.5709e-11	1.02949e-11	5.80257e-05	1.4858e-11
92.0621	C7H8			0.00020395	0.000103119	2.54578e-05	3.10263e-05
92.107	C4H13NOH	noID	no ID	1.54938e-05	4.10002e-06	8.9608e-11	3.37658e-11	5.85213e-06	3.78096e-11
93.0335	C6H4OH	noID	no ID	6.59327e-11		0.000168792		3.8963e-11	0.00011143
93.0546	C3H8O3H	noID	no ID	0.00059687	0.000155751	0.000449917	0.000118085	0.000292699	0.000246476
93.0699	C7H8H	Toluene	toluene	0.00844811	0.00390736	0.00360977	0.00111771	0.00573558	0.00273777
94.0287	C5H3NOH	2Furancarbonitrile	2-furan carbonitrile (30%), 3-furan carbonitrile (70%)	6.54393e-05	2.76896e-05	0.000101867	0.000126231	2.46634e-05	4.28892e-05
94.0413	C6H5OH			0.000268134		1.41381e-07
94.0499	C2H7NO3H	noID	no ID	2.8615e-11		6.49111e-12		1.49419e-11	3.78644e-12
94.0651	C6H7NH	Methylpyridine	2-methyl pyridine (93%), 3-methylpyridine (7%)	0.000475533	0.000227473	0.000621707	0.000299152	0.000228233	0.000333337
94.9984	C2H6S2H	Dimethyldisulfide	dimethyl disulfide
95.0128	C5H2O2H	noID	no ID	5.34415e-11		0.000379024		2.98843e-11	0.000236773
95.0491	C6H6OH	Phenol	phenol (100%), vinyl furan	0.0143978	0.00390886	0.00853736	0.00164343	0.0124542	0.00824977
95.0855	C7H10H	noID	no ID	0.00304103	0.00229485	0.00137963	0.00059031	0.00200357	0.00101543
96.0206	C5H3O2H	noID	no ID	0.000188956	0.000125194	0.000253644	0.000116612	0.00010551	0.000158218
96.0444	C5H5NOH	4Pyridinol	4-Pyridinol, pyridine oxide	0.000218188	0.000130577	0.000701918	0.000359459	8.20581e-05	0.000294901
96.0808	C6H9NH	C2pyrroles	2,5-dimethyl pyrrole (70%), ethylpyrrole (25%), other C2-pyrroles (5%)	0.00026185	0.000114722	0.000205852	0.000195423	0.000135041	0.000118596
97.0284	C5H4O2H	Furfural	2-furfural (88%), 3-furfural (4%), other HCO2 (12%)	0.0196665	0.00845032	0.0278227	0.00704047	0.00857009	0.0135443
97.0648	C6H8OH	Dimethylfuran	2,5-dimethyl furan (44%), 2-ethylfuran (10%), other C2-furans (46%)	0.00471343	0.00187936	0.00727535	0.00131595	0.00321495	0.00554358
97.1012	C7H12H	noID	no ID	0.00158031	0.000469325	0.00134235	0.000521565	0.00103185	0.000979129
98.0237	C4H3NO2H	noID	no ID	0.000545738	0.000222521	0.000213309	0.000181867	0.000204818	8.94319e-05
98.06	C5H7NOH	noID	no ID	0.000126377	8.24709e-05	0.000245629	0.00013719	4.74298e-05	0.000102982
98.0964	C6H11NH	4methylpentanenitrile	4-methylpentanenitrile	0.000139915	6.30796e-05	4.695e-05	6.97064e-05	4.6665e-05	1.74929e-05
99.0011	C3H2N2SH	noID	no ID	0.000323332	0.000240605	0.000192862	0.000353814	0.00016814	0.000112039
99.0077	C4H2O3H	noID	no ID	0.00269057	0.0013537	6.40809e-12	2.27529e-12	0.00131269	3.49256e-12
99.0263	C5H6SH	Methylthiophene	methylthiofuran (methyl thiophene)	0.000380221	0.00040809	0.000527747	0.000251429	0.000254088	0.000393979
99.0441	C5H6O2H	2Methanolfuran	2-methanol furannone	0.0102588	0.00422001	0.0172997	0.00435991	0.00570168	0.010741
99.0804	C6H10OH	methylcyclopentanone_cyclohexanone	methylcyclopentanone+cyclohexanone (26%), hexenones (74%)	0.000879641	0.000318522	0.000914727	0.000429866	0.00036233	0.000420911
99.1168	C7H14H	noID	no ID	0.000238367	0.000144496	0.000468483	0.000192771	0.000154269	0.000338708
100.039	C4H5NO2H	noID	no ID	0.000154542	0.000127055	0.000424855	0.000283126	5.78816e-05	0.00017776
100.076	C5H9NOH	noID	no ID	1.51559e-05	2.60136e-05	0.000191976	0.000189076	5.67644e-06	8.03232e-05
100.088	C6H12O	noID	no ID
100.112	C6H13NH	noID	no ID	1.20096e-10		2.75115e-08		6.16258e-11	1.57706e-08
101.023	C4H4O3H	Dihydrofurandione	Dihydrofurandione	0.0014711	0.00121795	0.00147602	0.000752799	0.000716626	0.000803231
101.06	C5H8O2H	Methylmethacrylate	methyl methacrylate (69%), other HCO2 (31%)	0.0032785	0.00122661	0.00633556	0.000641769	0.00191289	0.00412951
101.096	C6H12OH	Hexanone	hexanals (47%), hexanones (53%)	0.000133251	7.53181e-05	0.0001089	0.000119552	5.71363e-05	5.21638e-05
101.132	C7H16H	noID	no ID	7.83764e-05	5.58105e-05	0.000123444	4.84508e-05	5.02856e-05	8.84765e-05
102.019	C3H3NO3H	noID	no ID
102.055	C4H8NO2	noID	no ID
102.091	C5H11NOH	noID	no ID	6.76155e-05	3.19313e-05	0.000122284	8.50408e-05	2.52738e-05	5.10614e-05
103.039	C4H6O3H	Aceticanhydride	acetic anhydride, MPAN and CPAN indicator	0.00303201	0.00100452	0.00509907	0.00183759	0.00134898	0.00253435
103.054	C8H6H	Phenylacetylene	Phenylacetylene (= ethynyl benzene)
103.075	C5H10O2H	noID	no ID	0.000303395	0.000258347	0.000991133	0.000774951	0.000167483	0.000611214
103.112	C6H14OH	noID	no ID	0.000121107	5.94277e-05	0.000127574	0.000137241	6.98774e-05	8.22298e-05
104.049	C7H5NH	Benzonitrile	Benzonitrile (benzene nitrile)	0.000980235	0.000475499	0.000865907	0.000471694	0.000393129	0.00038795
104.107	C5H13NOH	noID	no ID	4.09407e-05	3.25574e-05	1.98298e-05	2.65418e-05	1.52731e-05	8.26399e-06
105.018	C3H4O4H	noID	no ID
105.033	C7H4OH	noID	no ID	0.000258566	0.00017185	0.000153822	0.000124495	0.000148462	9.86645e-05
105.055	C4H8O3H			0.000484203	0.000156589	0.000330082	7.46701e-05
105.07	C8H8H	Styrene	styrene	0.00432982	0.00227901	0.000417805	0.00037626	0.00255891	0.000275841
106.065	C7H7NH	Vinylpyridine	vinyl pyridine	0.000152646	6.49762e-05	1.40508e-05	2.14095e-05	7.63907e-05	7.85517e-06
106.078	C8H10	noID	no ID
106.123	C5H15NOH	noID	no ID	2.20425e-05	2.80325e-06	6.73633e-11	9.3273e-12	8.20729e-06	2.80196e-11
106.998	C2H2O5H	noID	no ID
107.049	C7H6OH	Benzaldehyde	benzaldehyde	0.00449416	0.00206773	0.0019303	0.000761937	0.00210651	0.00101074
107.07	C4H10O3H	noID	no ID	2.56205e-07		7.62913e-12		1.24287e-07	4.1344e-12
107.086	C8H10H	C8_Aromatics	m+p-xylene (68%), o-xylene (23%), ethylbenzene (10%)	0.00339782	0.00210755	0.0016221	0.000628306	0.00247499	0.00131993
108.011	C2H6NO2S	noID	no ID
108.044	C6H5NOH	PyridineAldehyde	methyl furonitrile (~33%), nitrosobenzene ~33%), pyridine aldehyde (~33%)	0.000160329	6.03842e-05	0.000139673	7.3113e-05	8.09304e-05	7.87611e-05
108.066	C3H9NO3H	noID	no ID	2.55778e-05	3.37791e-05	9.14652e-05	4.19354e-05	1.31702e-05	5.2612e-05
108.081	C7H9NH	Dimethylpyridine_Heptylnitriles	dimethyl + ethyl pyridine (~50%), heptyl nitriles (~50%)	0.000115221	0.000108643	0.000248416	0.000179088	4.89637e-05	0.000117929
109.028	C6H4O2H	Benzoquinone	Quinone (=p-Benzoquinone)	0.00768742	0.0125134	0.00367364	0.00136413	0.00398964	0.00212985
109.065	C7H8OH	Cresol	cresols (= 4-methylphenol) (50%), anisole (50%)	0.0047191	0.00268766	0.0076887	0.00171364	0.00397396	0.0121354
109.101	C8H12H	noID	no ID	0.00172911	0.000797021	0.000901734	0.000533407	0.00107303	0.000625128
110.036	C6H5O2H	noID	no ID	5.09882e-05	6.97295e-05	0.000720275	0.00030589	2.77824e-05	0.000438428
110.06	C6H7NOH	noID	no ID	0.000111769	7.41605e-05	0.000452778	0.000236829	4.14621e-05	0.000187636
110.096	C7H11NH	C7acrylonitriles_C3pyrroles	C7_acrylonitriles (~50%), C3_pyrroles (~50%)	7.18876e-05	4.84128e-05	0.000140075	8.49246e-05	3.0081e-05	6.54785e-05
111.044	C6H6O2H	MethylFurfural_BenzeneDiol	methyl furfural (~50%), benzene diols (=catechol+resorcinol) (~50%), 2-acetyl furan	0.00897705	0.00561839	0.0221596	0.00894317	0.00710701	0.0195981
111.08	C7H10OH	C3_furans	C3_furans (55%), other compounds (45%)	0.00185247	0.000997191	0.00274256	0.00125053	0.00112665	0.00186335
111.117	C8H14H	noID	no ID	0.000631894	0.000196917	0.00106871	0.000377408	0.000389014	0.000734987
112.039	C5H5NO2H	Dihydroxypyridine_methylmalimide	dihydroxy pyridine (~50%), methyl maleimide (~50%)	0.000232185	8.10073e-05	0.000247801	0.000109597	8.59783e-05	0.000102508
112.076	C6H9NOH	noID	no ID	5.49195e-05	3.60366e-05	0.000133367	0.000102852	2.03367e-05	5.517e-05
112.088	C7H12O	noID	no ID
113.023	C5H4O3H	5Hydroxy2furfural	5-Hydroxy 2-furfural, 2-furoic acid	0.00269941	0.000946859	0.00302821	0.00172424	0.00130476	0.00163511
113.06	C6H8O2H	2hydroxy3methyl2cyclopenten1one	2-hydroxy-3-methyl-2-cyclopenten-1-one	0.00369357	0.00169271	0.00887391	0.00175332	0.00200066	0.00536959
113.096	C7H12OH	Ethylcyclopentanone	ethyl cyclopentanone	0.00037403	0.000149497	0.000303573	0.000217699	0.00015553	0.000141017
113.132	C8H16H	noID	no ID	0.000125658	7.71835e-05	0.000369158	0.00011171	7.67531e-05	0.000251894
114.019	C4H3NO3H	Nitrofuran	nitrofuran
114.037	C5H8NS	noID	no ID
114.055	C5H7NO2H	noID	no ID	9.01611e-05	6.09502e-05	0.000247433	0.000191065	3.33286e-05	0.000102178
114.091	C6H11NOH	noID	no ID	2.16642e-07	3.06353e-07	4.11936e-05	5.82565e-05	8.00831e-08	1.70109e-05
114.128	C7H15NH	noID	no ID
115.039	C5H6O3H	Hydroxymethylfuranone	5-hydroxymethyl-2[3H]-furanone	0.00452458	0.00182043	0.00796318	0.00303056	0.00218452	0.00429501
115.075	C6H10O2H	Vinylethylacetate	C6 diketone isomers (46%), C6 esters (54%)	0.00077877	0.000185316	0.00101189	0.000291543	0.000425458	0.000617562
115.112	C7H14OH	Heptanal	heptanal (63%), 2,4-dimethyl-3-pentanone (24%), heptanone (13%)	0.000213218	0.000111327	0.000387296	0.000205897	8.97133e-05	0.000182044
116.034	C4H5NO3H	noID	no ID	4.4467e-05	2.09675e-05	2.678e-05	2.73207e-05	2.26534e-05	1.52407e-05
116.071	C5H9NO2H	noID	no ID	4.56422e-05	1.87394e-05	2.154e-05	1.97779e-05	1.68433e-05	8.87985e-06
116.107	C6H13NOH	noID	no ID	2.20979e-05	1.97556e-05	0.000111263	6.56386e-05	8.15476e-06	4.58681e-05
116.906	CCl3
117.018	C4H4O4H	noID	no ID	0.000190789	0.000127501	0.000190088	0.000100813	9.09238e-05	0.0001012
117.055	C5H8O3H	Dihydroxymethyldihydrofurfural	2,5-Dihydroxymethyl dihydrofurfural, C5 3-oxy 2-DBE isomers	0.00191515	0.000997297	0.00809293	0.00426466	0.00092367	0.00436032
117.07	C9H8H	Indene	indene (96%), methyl ethynyl benzene (4%)	0.00164574		5.73371e-12		0.000989907	3.85273e-12
117.091	C6H12O2H	C6_Esters	butyl ester acetic acid, other C6_esters	6.99333e-05	0.000144151	0.000420658	0.000395385	4.06859e-05	0.000273394
117.127	C7H16OH	noID	no ID	8.14036e-05	7.18496e-05	0.000290007	0.000283101	4.53764e-05	0.00018059
118.013	C3H3NO4H	noID	no ID
118.05	C4H7NO3H	Butenenitrates	butene nitrates	0.0001048	0.000102021	4.18555e-05	4.16547e-05	5.42681e-05	2.42123e-05
118.065	C8H7NH	Benzeneacetonitrile	Benzeneacetonitrile (benzyl nitrile)	0.000534156	0.000203224	0.000186356	0.000201997	0.000189774	7.39626e-05
119.034	C4H6O4H	noID	no ID	0.000158679	8.25272e-05	0.000269416	0.000136922	7.55398e-05	0.000143278
119.049	C8H6OH	Benzofuran	benzofuran	0.00154265	0.0019567	0.000601765	0.000259015	0.00102646	0.000447303
119.07	C5H10O3H	noID	no ID	0.000181565		2.18855e-11		8.74775e-05	1.17793e-11
119.086	C9H10H	methylstyrene	Indane (13%), MethylStyrene (84%), propenyl benzene+methyl ethenyl benzene (3%)	0.0022503	0.000698873	1.07846e-05	1.33527e-05	0.00135872	7.27434e-06
120.044	C7H5NOH	noID	no ID	0.000107302	5.79325e-05	0.000142045	8.13402e-05	3.94682e-05	5.83668e-05
120.066	C4H9NO3H	noID	no ID	1.47195e-06		0.000129725		7.4553e-07	7.33999e-05
120.081	C8H9NH	Dihydropyridine	dihydro pyridine	6.09874e-05	1.15067e-05	2.24079e-11	1.12749e-11	2.99769e-05	1.2304e-11
120.093	C9H12	noID	no ID
120.138	C6H17NOH	noID	no ID
121.013	C3H4O5H	noID	no ID
121.05	C4H8O4H	noID	no ID	8.15247e-05	5.79326e-05	0.000283018	0.000171441	3.87699e-05	0.000150355
121.065	C8H8OH	Tolualdehyde	tolualdehyde (~100%), acetophenone, dihydro benzofuran	0.00421513	0.00157088	0.0031669	0.00153386	0.00174673	0.00146605
121.101	C9H12H	C9_Aromatics	C9 aromatics	0.00142177	0.00120786	0.000628126	0.000510017	0.000890161	0.000439324
121.122	C6H16O2H	noID	no ID	0.000132895	0.000119534	0.000246819	0.00018579	7.08077e-05	0.00014691
122.024	C6H3O2NH	noID	no ID
122.045	C3H7NO4H	noID	no ID
122.06	C7H7NOH	noID	no ID	0.000126102	5.13054e-05	0.000215915	0.000107207	4.63104e-05	8.85807e-05
122.081	C4H11NO3H	noID	no ID
122.096	C8H11NH	noID	no ID	2.21296e-10	2.79082e-10	0.000152073	0.000215064	1.10126e-10	8.4541e-05
123.044	C7H6O2H	Salicylaldehyde	salicyladehyde (~100%), benzodioxole, benzoic acid	0.00218035	0.00111768	0.00272284	0.000844254	0.00090736	0.00126583
123.08	C8H10OH	Dimethylphenol_methylanisole	4-ethylphenol+dimethylphenol (~50%), methylanisole (~50%)	0.00181175	0.000718302	0.00420419	0.00123712	0.00101204	0.0027663
123.117	C9H14H	noID	no ID	0.00105172	0.000552323	0.000498088	0.000357118	0.000618725	0.000327343
124.039	C6H5NO2H	Nitrobenzene	nitrobenzene	7.34892e-05	2.66524e-05	0.000116931	8.71239e-05	4.72468e-05	8.39805e-05
124.052	C7H8O2	noID	no ID	2.00078e-06	2.8292e-06	0.00130102	0.000242368	1.05928e-06	0.000769477
124.076	C7H9NOH	noID	no ID	4.60423e-05	3.2078e-05	0.000132511	0.000133364	1.68829e-05	5.42804e-05
124.112	C8H13NH	noID	no ID	2.57293e-05	1.98436e-05	6.92703e-05	5.41145e-05	1.27638e-05	3.83882e-05
125.023	C6H4O3H	Hydroxybenzoquinone	hydroxy benzoquinone	0.00179183	0.00146959	0.00251001	0.00122947	0.00086079	0.00134702
125.06	C7H8O2H	Guaiacol	guaiacol (=2-methoxy phenol) (~100%), propionylfuran, acetylmethylfuran	0.00293209	0.00175377	0.0139835	0.00715364	0.00196818	0.0104859
125.096	C8H12OH	noID	no ID	0.000936433	0.000428681	0.000394483	0.000449014	0.000511815	0.00024086
125.107	C7H12N2H	noID	no ID	4.93736e-11		0.00157207		1.97127e-11	0.000701171
125.132	C9H16H	noID	no ID	0.000161843	8.27962e-05	0.000604667	0.000302582	9.45307e-05	0.000394544
126.019	C5H4NO3	noID	no ID	9.84276e-05		9.37826e-05		4.93985e-05	5.25797e-05
126.037	C6H8NS	noID	no ID	7.26405e-05	9.54799e-05	0.000281257	7.63795e-05	3.64565e-05	0.000157688
126.055	C6H7NO2H	noID	no ID	8.07309e-05	6.34733e-05	0.000132083	0.000162904	2.95585e-05	5.40243e-05
126.091	C7H11NOH	noID	no ID	8.14046e-11		4.42532e-12		2.98052e-11	1.81004e-12
126.104	C8H14O	noID	no ID
126.128	C8H15NH	C8_Nitriles	C8 nitrile
126.97	C2H6S3H	Dimethyltrisulfide	dimethyl trisulfide
127.039	C6H6O3H	Hydroxymethylfurfural	5-Methyl hydroxy 2-furfural	0.00430478	0.00314586	0.0123371	0.00694743	0.0020661	0.00661475
127.075	C7H10O2H	noID	no ID	0.000651472	0.000448853	0.00218863	0.000695096	0.000342704	0.00128616
127.112	C8H14OH	noID	no ID	0.000419667	0.000154978	0.000706169	0.000468133	0.000228254	0.000429063
127.148	C9H18H	noID	no ID	3.23019e-05	3.13704e-05	0.000129273	6.82491e-05	1.87341e-05	8.37553e-05
128.062	C10H8	noID	no ID
128.071	C6H9NO2H	noID	no ID	8.30333e-11		0.000178429		3.03573e-11	7.28747e-05
128.107	C7H13NOH	noID	no ID
128.143	C8H17NH	noID	no ID
129.055	C6H8O3H	Dihydroxymethylfuran	2,5-di(hydroxymethyl)furan, methyl hydroxy dihydrofurfural	0.0022457	0.00102871	0.00580992	0.00253241	0.00107687	0.00311229
129.07	C10H8H	Naphthalene	Naphthalene	0.00324505	0.00112365	0.000239255	0.00021767	0.0019298	0.000158947
129.091	C7H12O2H	noID	no ID	8.81098e-07	1.3384e-06	0.000641017	0.000295256	4.61505e-07	0.000375078
129.127	C8H16OH	noID	no ID	0.000134551	0.000104346	0.000354607	0.000136219	7.28255e-05	0.000214409
129.164	C9H20H	noID	no ID	0.000126791	5.04846e-05	2.20717e-05	2.61537e-05	7.30233e-05	1.42007e-05
130.013	C4H3NO4H	noID	no ID
130.05	C5H7NO3H	noID	no ID	4.62031e-05	3.74631e-05	5.7624e-05	8.11617e-05	2.30418e-05	3.21032e-05
130.065	C9H8N	noID	no ID	6.01692e-05	5.48197e-05	0.000144733	4.98014e-05	2.95626e-05	7.94393e-05
130.123	C7H15NOH	noID	no ID	1.10216e-10	1.44958e-10	2.8475e-05	4.02696e-05	4.02384e-11	1.16134e-05
131.034	C5H6O4H	noID	no ID	0.000269018	9.46458e-05	0.000323341	0.000183164	0.000127327	0.000170962
131.049	C9H6OH	noID	no ID	0.000680592	0.00049539	0.000327568	0.000241431	0.000366585	0.000197101
131.07	C6H10O3H	noID	no ID	0.000213029	0.0001415	0.000520364	0.000193722	0.000102062	0.000278506
131.086	C10H10H	dihydronaphthalene	Dihydronaphthalene	0.00104967	0.000419809	0.000175213	0.000123707	0.000600393	0.000111957
131.107	C7H14O2H	noID	no ID	2.34321e-05	5.09873e-05	0.000298509	0.000277411	1.22204e-05	0.000173913
131.143	C8H18OH	noID	no ID	9.0934e-05		2.2125e-05		4.89795e-05	1.33129e-05
131.993	C3HO5NH	noID	no ID
132.044	C8H5ONH	noID	no ID	0.000205531		1.982e-11		7.49333e-05	8.07236e-12
132.066	C5H9NO3H	noID	no ID	0.000294094		2.5082e-11		0.000146195	1.39286e-11
132.081	C9H9NH	MethylBenzeneAcetonitrile	MethylBenzeneAcetonitrile	0.000127879	8.23734e-05	0.000155821	0.000111478	4.15139e-05	5.65093e-05
133.013	C4H4O5H	noID	no ID
133.05	C5H8O4H	noID	no ID	0.00015646	7.70877e-05	0.000593746	0.000207129	7.39876e-05	0.000313658
133.065	C9H8OH	Methylbenzofurans	Methylbenzofurans	0.00325671	0.0081999	0.00122337	0.000597241	0.00193078	0.000810237
133.101	C10H12H	Methylpropenylbenzene	EthylStyrene (~50%), butenyl benzene isomers (~50%), MethylIndane	0.00105184	0.000540356	0.000429601	0.000424055	0.000597566	0.000272647
134.06	C8H7NOH	noID	no ID	8.24316e-06	1.22518e-05	0.00013221	0.000119416	3.00129e-06	5.37747e-05
134.096	C9H11NH	noID	no ID
134.154	C7H19NOH	noID	no ID	4.3189e-05	6.64844e-05	3.2349e-06	5.02365e-06	1.57249e-05	1.31575e-06
135.029	C4H6O5H	noID	no ID
135.044	C8H6O2H	noID	no ID	0.000516259	0.000273612	0.000831069	0.000380684	0.000266913	0.000479997
135.08	C9H10OH	3methylacetophenone	chavicol, methyl acetophenone, ethenyl methoxy benzene	0.00112715	0.000486351	0.00138404	0.000530618	0.000464638	0.000637358
135.117	C10H14H	C10_Aromatics	C10 aromatics (92%), fragments on this mass subtracted	0.00118104	0.000821044	0.000351706	0.000367132	0.000768576	0.000255682
136.039	C7H5O2NH	noID	no ID	2.08838e-05	2.40662e-05	0.0001159	4.42634e-05	7.59373e-06	4.70792e-05
136.06	C4H9NO4H	noID	no ID	4.32324e-05	3.43675e-05	0.000168625	6.70637e-05	2.13509e-05	9.30312e-05
136.076	C8H9NOH	noID	no ID	3.34848e-05	3.07254e-05	5.48664e-05	5.67615e-05	1.21757e-05	2.2287e-05
136.112	C9H13NH	noID	no ID
137.006	C7H4OSH	noID	no ID
137.023	C7H4O3H	noID	no ID	8.73279e-05		1.18391e-05		4.17183e-05	6.31819e-06
137.06	C8H8O2H	Methylbenzoicacid	Methylbenzoicacid	0.000949285	0.000396211	0.00293802	0.00135065	0.000536849	0.00185614
137.096	C9H12OH	noID	no ID	0.000228913	0.000281436	0.00143822	0.000622824	0.000121531	0.000852987
137.132	C10H16H	Monoterpenes	monoterpenes	0.00556806	0.0063938	0.00074821	0.00085932	0.0152461	0.00228865
138.019	C6H3O3NH	noID	no ID
138.055	C7H7NO2H	Nitrotoluene	nitrotoluene	6.38191e-05	4.30584e-05	0.000286096	0.000163289	2.23251e-05	0.000111803
138.076	C4H11NO4H	noID	no ID	1.15163e-10	1.89379e-10	0.000428896	0.000214055	5.6687e-11	0.000235842
138.091	C8H11NOH	noID	no ID
139.021	C7H6OSH	noID	no ID	9.10766e-10		0.000362539		4.47564e-10	0.000199023
139.039	C7H6O3H	noID	no ID	0.000310752	0.000409268	0.00141777	0.000755731	0.000148282	0.000755752
139.075	C8H10O2H	MethylGuaiacol	methylguiacol (creosol)	0.00118191	0.00117319	0.00900383	0.00606066	0.000793361	0.00675173
139.112	C9H14OH	noID	no ID	0.000512526	0.000263439	0.000132569	0.000198721	0.000270808	7.82504e-05
139.148	C10H18H	noID	no ID	3.69131e-05	6.37096e-05	0.000493748	0.000301847	2.05591e-05	0.000307206
140.049	C10H5NH	noID	no ID	3.81775e-06	5.73874e-06	0.000376279	0.000187718	1.845e-06	0.000203141
140.071	C7H9NO2H	noID	no ID	1.08617e-10	1.26332e-10	9.28675e-05	0.000131334	3.93958e-11	3.76284e-05
140.107	C8H13NOH	noID	no ID
140.143	C9H17NH	noID	no ID
140.97	C5H3NS2	noID	no ID
141.018	C6H4O4H	noID	no ID	2.56022e-07		0.000151362		1.20612e-07	7.96581e-05
141.055	C7H8O3H	noID	no ID	0.000383241	0.000205886	0.00269524	0.00117097	0.000182645	0.00143494
141.091	C8H12O2H	noID	no ID	0.000230487	8.03146e-05	0.000648632	0.000253719	0.000117617	0.000369762
141.127	C9H16OH	noID	no ID	0.000135793	4.01303e-05	0.000213913	0.000123777	7.14104e-05	0.000125667
141.164	C10H20H	noID	no ID	1.77588e-05	1.01047e-05	9.32893e-05	4.22355e-05	9.82748e-06	5.76713e-05
142.05	C6H7NO3H	noID	no ID	2.55064e-05	1.76615e-05	2.9587e-05	3.23399e-05	1.24715e-05	1.61611e-05
142.086	C7H11NO2H	noID	no ID
142.123	C8H15NOH	noID	no ID
142.935	CH3IH	noID	no ID
143.034	C6H6O4H	noID	no ID	0.000276016	0.00021591	0.00110062	0.000810642	0.000129882	0.000578563
143.07	C7H10O3H	noID	no ID	0.00023277	0.00014644	0.00145416	0.000706535	0.000110787	0.000773168
143.086	C11H10H	Methylnaphthalene	Methyl naphthalene	0.00115817	0.000445795	0.000210626	0.000163151	0.000644445	0.000130926
143.107	C8H14O2H	noID	no ID	2.91111e-05	4.23461e-05	0.000376325	0.000153037	1.47908e-05	0.000213597
143.143	C9H18OH	noID	no ID	3.02722e-05	2.44988e-05	0.000114371	8.61626e-05	1.58445e-05	6.68728e-05
143.179	C10H22H	noID	no ID	6.07472e-05	2.29653e-05	2.87535e-05	2.5734e-05	3.34037e-05	1.76628e-05
144.044	C9H5ONH	noID	no ID
144.066	C6H9NO3H	noID	no ID	4.89457e-11		0.000310277		2.38518e-11	0.00016891
144.081	C10H9NH	noID	no ID
144.138	C8H17NOH	noID	no ID	2.28424e-11		1.66605e-11		8.26526e-12	6.73445e-12
144.175	C9H21NH	noID	no ID
145.05	C6H8O4H	Levoglucosan_Dehydration	Levoglucosan pyrolysis product	0.00111055	0.000860601	0.00561374	0.00488883	0.000521936	0.00294734
145.065	C10H8OH	Ethenylbenzofuran	2-ethenyl benzofuran	0.000484255	0.000140964	0.000621943	0.000429728	0.000276039	0.000396047
145.101	C11H12H	Ethylindene	ethylindene	0.000612543	0.000228271	6.67462e-07	1.33482e-06	0.000334718	4.07445e-07
145.122	C8H16O2H	noID	no ID	4.58515e-05	5.66994e-05	0.000513994	0.000438106	2.3195e-05	0.000290468
145.159	C9H20OH	noID	no ID	3.49314e-05	2.20734e-05	9.32299e-05	5.20537e-05	1.81975e-05	5.42562e-05
146.096	C10H11NH	noID	no ID	1.32769e-06	1.87746e-06	5.3503e-05	7.42406e-05	6.35188e-07	2.85946e-05
147.029	C5H6O5H	noID	no ID
147.044	C9H6O2H	noID	no ID	0.000387548	0.000665944	0.000449111	0.000285002	0.000195199	0.000252701
147.065	C6H10O4H	noID	no ID	3.69868e-05	3.17549e-05	0.000529662	0.000250449	1.73603e-05	0.000277721
147.08	C10H10OH	dimethylbenzofuran	dimethylbenzofuran, ethyl benzofuran	0.000526369	0.000184868	0.00125123	0.000385073	0.000298173	0.000791796
147.117	C11H14H	noID	no ID	0.000311299	0.000155676	8.98498e-05	0.00018163	0.000169055	5.4509e-05
148.039	C8H5NO2H	noID	no ID	3.64622e-06	4.36012e-06	8.70487e-05	6.10804e-05	1.31635e-06	3.51068e-05
148.076	C9H9NOH	noID	no ID	2.66614e-06	4.61706e-06	0.000118728	0.000108804	9.62524e-07	4.7883e-05
148.17	C8H21NOH	noID	no ID	1.73399e-11		5.53033e-06		6.26001e-12	2.23038e-06
149.023	C8H4O3H	noID	no ID	7.28735e-05	5.75009e-05	0.000244045	0.000107552	3.45318e-05	0.000129187
149.06	C9H8O2H	noID	no ID	0.000639396	0.000873125	0.00155579	0.000561331	0.000320655	0.000871602
149.096	C10H12OH	Methylchavicol	Methyl chavicol (estragole)	0.000446665	0.000541559	0.000590699	0.000250337	0.000243483	0.00035971
149.132	C11H16H	C11_aromatics	C11 aromatics	0.000325697	0.000179275	0.000152673	0.000238201	0.000175795	9.20566e-05
149.154	C8H20O2H			6.49348e-05	7.63112e-05	7.72076e-05	2.68705e-05
150.055	C8H7NO2H	noID	no ID	1.16054e-05	1.39857e-05	0.000170997	9.06603e-05	4.18518e-06	6.88878e-05
150.076	C5H11NO4H	noID	no ID	1.18704e-05	1.90549e-05	0.000228957	0.000120537	5.72602e-06	0.000123379
150.091	C9H11NOH	noID	no ID
150.128	C10H15NH	noID	no ID
151.024	C4H6O6H	noID	no ID
151.039	C8H6O3H	noID	no ID	6.22559e-05	6.57206e-05	0.000415092	0.000158271	2.94533e-05	0.00021938
151.075	C9H10O2H	VinylGuaiacol	vinylguaiacol	0.00120147	0.000908576	0.00480206	0.00222316	0.000599927	0.00267864
151.112	C10H14OH	noID	no ID	0.000664876	0.000462654	0.000355291	0.000357447	0.000341575	0.000203906
151.148	C11H18H	noID	no ID	0.000163222	9.61497e-05	0.000340226	0.000213414	8.7568e-05	0.000203908
152.034	C7H5NO3H	noID	no ID
152.071	C8H9NO2H	noID	no ID
152.883	CCl4H			0.000122103	0.000168637	7.41691e-05	0.000104891
153.055	C8H8O3H	Vanillin	Vanillin, methyl salicylate, C8 aromatic hydroxyacid	0.000400111	0.000465574	0.00290595	0.00142556	0.000383584	0.0031122
153.07	C12H8H	Acenaphtylene	acenaphthylene
153.091	C9H12O2H	noID	no ID	0.000235791	0.000345471	0.00332236	0.00197186	0.000117229	0.00184525
153.127	C10H16OH	Camphor	camphor (30%), other oxygenated monoterpenes (70%) VARIABLE	0.00166006	0.00388762	0.000202966	0.000268905	0.000771804	0.000105416
153.164	C11H20H	noID	no ID	2.39817e-05	2.09687e-05	0.00024098	0.000145468	1.27895e-05	0.000143566
154.065	C11H7NH	noID	no ID	2.09223e-05	3.63303e-05	0.000365806	0.000103048	9.87487e-06	0.000192873
154.086	C8H11NO2H	noID	no ID	1.39653e-11		2.29641e-11		5.02562e-12	9.23184e-12
154.172	C11H21H	noID	no ID
155.034	C7H6O4H	noID	no ID	7.99575e-05	5.99602e-05	0.000275654	0.000115002	3.7308e-05	0.000143683
155.07	C8H10O3H	Syringol	syringol	0.000136306	0.000161839	0.00412032	0.00383524	6.4269e-05	0.00217029
155.086	C12H10H	noID	no ID
155.107	C9H15O2	noID	no ID	1.96113e-05	2.24121e-05	0.000308607	0.000210452	9.70832e-06	0.000170664
155.143	C10H18OH	Cineole	Cineole, other oxygenated monoterpenes	7.41228e-05	6.40902e-05	0.000148636	0.000197521	3.97342e-05	8.90095e-05
155.179	C11H22H	noID	no ID	3.35856e-05	1.54052e-05	0.000180353	0.000118908	1.78058e-05	0.000106815
156.066	C7H9NO3H	noID	no ID
157.05	C7H8O4H	noID	no ID	5.22682e-05	4.81972e-05	0.000424571	0.000168083	2.43486e-05	0.000220946
157.065	C11H8OH	noID	no ID	0.00020367	0.000162347	0.000258996	0.000402383	0.000103212	0.000146621
157.086	C8H12O3H	noID	no ID	3.13613e-05	5.34223e-05	0.000784245	0.000402041	1.47609e-05	0.000412354
157.101	C12H12H	13dimethylnaphthalene	C2 naphthalenes	0.000521758	0.000266531	0.00029111	0.000280739	0.000275007	0.000171408
157.122	C9H16O2H	noID	no ID	1.14003e-05	1.2978e-05	0.00030992	0.000126299	5.61937e-06	0.000170656
157.159	C10H20OH	Decanal	Decanal (likely major contributor), menthol	2.21017e-05	2.14041e-05	5.65492e-05	5.5609e-05	9.00637e-06	2.57425e-05
157.195	C11H24H	noID	no ID	3.05539e-05	1.24258e-05	3.36924e-05	2.70615e-05	1.61043e-05	1.98384e-05
158.096	C11H11NH	noID	no ID
158.975	C5H2O4SH	noID	no ID
159.029	C6H6O5H	noID	no ID
159.044	C10H6O2H	noID	no ID
159.065	C7H10O4H	noID	no ID	1.12454e-05	2.20245e-05	0.000418635	0.000210176	5.22977e-06	0.000217492
159.08	C11H10OH	noID	no ID	0.000107932	9.02178e-05	0.000492481	0.000217959	5.44497e-05	0.000277546
159.117	C12H14H	noID	no ID	0.000334936	0.000137817	0.000114964	0.000223302	0.000175522	6.73026e-05
159.138	C9H18O2H	noID	no ID	1.14471e-06	1.41763e-06	0.000166794	0.000130236	5.61833e-07	9.14517e-05
159.174	C10H22OH	noID	no ID
160.076	C10H9ONH	noID	no ID
160.112	C11H13NH	noID	no ID
161.06	C10H8O2H	noID	no ID	8.06405e-05	6.9426e-05	0.000562091	0.00020118	3.94105e-05	0.000306877
161.096	C11H12OH	noID	no ID	0.000119128	8.68388e-05	0.000666926	0.000282084	5.98294e-05	0.000374178
162.055	C9H7NO2H	noID	no ID	6.10252e-11		0.000175735		2.18748e-11	7.0371e-05
162.091	C10H11NOH	noID	no ID
162.185	C9H23NOH	noID	no ID
163.039	C9H6O3H	noID	no ID	3.25335e-05	3.64496e-05	0.000335066	0.000131298	1.52273e-05	0.000175195
163.075	C10H10O2H	noID	no ID	0.000188681	0.000108399	0.0014929	0.000740001	9.18206e-05	0.0008116
163.112	C11H14OH	noID	no ID	7.8931e-05		2.16726e-05		3.94653e-05	1.21054e-05
163.148	C12H18H	C12_aromatics	C12 aromatics	0.000208766	5.39578e-05	9.78158e-05	0.000164418	0.00010817	5.66181e-05
163.169	C9H22O2H	noID	no ID	2.86736e-06	3.62868e-06	8.49088e-05	2.30463e-05	1.39539e-06	4.61599e-05
164.071	C9H9O2NH	noID	no ID	2.64045e-06		0.000146217		9.45609e-07	5.84967e-05
164.092	C6H13NO4H	noID	no ID
165.055	C9H8O3H	noID	no ID	2.49259e-05	3.54031e-05	0.000548976	0.000144283	1.16439e-05	0.000286483
165.091	C10H12O2H	Isoeugenol	Eugenol, isoeugenol	0.000395226	0.000450952	0.00398475	0.00241337	0.000191522	0.00215712
165.164	C12H20H	noID	no ID	3.22155e-05	3.16102e-05	0.000214386	0.000121761	1.65993e-05	0.000123402
166.123	C10H15NOH	noID	no ID
166.172	C12H21H	noID	no ID	7.69087e-08	1.08594e-07	1.28739e-05	7.76226e-06	3.95186e-08	7.38985e-06
167.019	C4H7O7	noID	no ID	1.1839e-06		0.00013184		5.54708e-07	6.90075e-05
167.07	C9H10O3H	noID	no ID	5.57006e-05	5.02047e-05	0.00178388	0.00109572	2.59684e-05	0.000929073
167.107	C10H14O2H	noID	no ID	0.000116957	0.000157696	0.000921078	0.000568944	5.64375e-05	0.000496521
167.143	C11H18OH	noID	no ID	4.3493e-05	3.07753e-05	0.000137649	0.000122055	2.15555e-05	7.62101e-05
167.179	C12H22H	noID	no ID	4.83268e-06	8.62668e-06	0.00012644	5.79722e-05	2.4764e-06	7.23797e-05
168.102	C9H13NO2H	noID	no ID	9.03061e-06	1.23014e-06	7.0003e-11	8.02454e-11	3.22829e-06	2.79558e-11
169.05	C8H8O4H	noID	no ID	2.82235e-05	3.56364e-05	0.000574067	0.000242629	1.30071e-05	0.000295551
169.065	C12H9O	noID	no ID	1.4099e-06		0.000881228		6.95716e-07	0.000485771
169.086	C9H12O3H	noID	no ID	2.0101e-05	1.56485e-05	0.00205484	0.0017545	9.35247e-06	0.00106803
169.105	C10H16SH	noID	no ID
169.122	C10H16O2H	noID	no ID	0.000136946	0.000123871	0.000293436	0.00019112	6.58062e-05	0.000157518
169.159	C11H20OH	noID	no ID	2.82975e-05	1.89986e-05	0.000114328	4.56494e-05	1.39634e-05	6.30226e-05
169.195	C12H24H	noID	no ID	1.36351e-05	1.09959e-05	0.000140773	8.57789e-05	6.94902e-06	8.01464e-05
170.081	C8H11NO3H	noID	no ID
170.154	C10H19NOH	noID	no ID
171.029	C7H6O5H	noID	no ID	3.24056e-06	3.10217e-06	5.92307e-05	2.8088e-05	1.50799e-06	3.07911e-05
171.065	C8H10O4H	noID	no ID	1.40898e-05	1.41051e-05	0.000225885	8.31071e-05	6.48091e-06	0.00011607
171.08	C12H11O	noID	no ID
171.117	C13H14H	noID	no ID	0.000236532	0.000124347	0.000289189	0.000475666	0.000119898	0.000163759
171.138	C10H18O2H	noID	no ID
171.174	C11H22OH	noID	no ID	2.60124e-05	2.92146e-05	3.34102e-05	4.12938e-05	1.27803e-05	1.83375e-05
171.211	C12H26H	noID	no ID	1.48644e-05	1.14554e-05	5.20577e-05	4.27198e-05	7.53478e-06	2.94787e-05
172.06	C7H9NO4H	noID	no ID	9.92489e-11		4.89924e-05		4.61066e-11	2.54253e-05
172.097	C8H13NO3H	noID	no ID	4.44253e-06	3.99216e-06	5.26158e-05	2.67215e-05	2.0638e-06	2.73057e-05
173.044	C7H8O5H	noID	no ID	2.41569e-05	2.2414e-05	0.000313768	8.23082e-05	1.12031e-05	0.000162557
173.06	C11H8O2H	noID	no ID
173.081	C8H12O4H	noID	no ID	6.99059e-06	1.73023e-05	0.000945426	0.000441982	3.20917e-06	0.000484849
173.096	C12H12OH	noID	no ID	3.36786e-06	4.43204e-06	0.000391792	0.000223236	1.64757e-06	0.000214114
173.132	C13H16H	noID	no ID	0.000144019	6.21744e-05	0.000194495	0.000336876	7.26149e-05	0.00010955
173.154	C10H20O2H	noID	no ID	8.68662e-07	9.95497e-07	0.000135179	6.18502e-05	4.13948e-07	7.19621e-05
174.091	C11H11NOH	noID	no ID
175.06	C7H10O5H	noID	no ID	4.19531e-05	5.62522e-05	0.000455005	0.000210704	1.93901e-05	0.000234927
175.075	C11H10O2H	noID	no ID	1.2843e-06	2.24818e-06	0.000496351	0.000258308	6.09484e-07	0.000263139
175.112	C12H14OH	noID	no ID	9.00953e-06	1.24568e-05	0.000565461	9.74372e-05	4.38866e-06	0.000307704
175.169	C10H22O2H	noID	no ID	4.37978e-07		5.84401e-05		2.07849e-07	3.09818e-05
176.071	C10H9O2NH	noID	no ID
176.107	C11H13NOH	noID	no ID
176.201	C10H25NOH	noID	no ID
177.055	C10H8O3H	noID	no ID	5.66503e-06	6.39368e-06	0.000383701	0.000219514	2.6138e-06	0.000197771
177.091	C11H13O2	noID	no ID	1.84e-07	2.60154e-07	0.00107241	0.000661781	8.69609e-08	0.000566196
177.127	C12H16OH	noID	no ID
177.164	C13H20H	C13_aromatics	C13 aromatics	0.000150302		6.85238e-06		7.49912e-05	3.81933e-06
177.185	C10H24O2H	noID	no ID
179.07	C10H10O3H	noID	no ID	2.09709e-06	5.4115e-06	0.000977856	0.000789897	9.65492e-07	0.000502928
179.107	C11H14O2H	noID	no ID	2.20481e-10	2.02577e-10	0.000546482	0.000142217	1.03776e-10	0.000287343
179.143	C12H18OH	noID	no ID
179.179	C13H22H	noID	no ID
180.066	C9H10NO3	noID	no ID	8.2759e-07	1.16989e-06	7.44695e-05	5.17885e-06	3.79266e-07	3.81248e-05
180.175	C12H21NH	noID	no ID	2.73843e-07	3.87243e-07	8.84082e-06	1.05475e-05	1.23703e-07	4.46141e-06
181.05	C9H8O4H	noID	no ID	6.99048e-06	9.88595e-06	0.000219224	3.90818e-05	3.1831e-06	0.000111514
181.086	C10H12O3H	noID	no ID	1.82463e-05	2.73196e-05	0.0018489	0.000813586	8.3822e-06	0.000948848
181.105	C11H16SH	noID	no ID	4.55606e-05	7.85772e-05	0.000392531	0.000320388	2.18942e-05	0.000210724
181.159	C12H20OH	noID	no ID	2.25318e-05	1.69994e-05	0.000218929	0.000159919	1.08373e-05	0.000117633
181.195	C13H24H	noID	no ID	1.40281e-06	2.12302e-06	0.000116013	3.94773e-05	6.92752e-07	6.40008e-05
182.118	C10H15NO2H	noID	no ID	2.1403e-06		5.5587e-11		7.60758e-07	2.20721e-11
183.029	C8H6O5H	noID	no ID
183.065	C9H10O4H	noID	no ID	1.89916e-05	2.30453e-05	0.000622448	0.000231879	8.62966e-06	0.000315962
183.102	C10H14O3H	noID	no ID	4.50928e-07	1.00825e-06	0.00120647	0.000434437	2.06696e-07	0.00061779
183.117	C14H14H	noID	no ID	2.78513e-06		0.000272669		1.36844e-06	0.000149663
183.138	C11H18O2H	noID	no ID
183.174	C12H22OH	noID	no ID	1.90038e-05	1.43075e-05	0.000157436	7.51865e-05	9.10239e-06	8.42401e-05
183.211	C13H26H	noID	no ID	8.81687e-06	1.05326e-05	8.58076e-05	2.09852e-05	4.33206e-06	4.70983e-05
184.133	C10H17NO2H	noID	no ID
185.029	C4H8O8H	noID	no ID
185.132	C14H16H	noID	no ID	4.71676e-05		0.000528765		2.30593e-05	0.000288779
185.154	C11H20O2H	noID	no ID	1.97795e-05	1.62943e-05	0.000148732	0.000119768	9.1971e-06	7.72573e-05
185.19	C12H24OH	noID	no ID	2.49141e-05	2.67949e-05	3.80039e-05	5.63057e-05	1.1884e-05	2.02509e-05
186.076	C8H11NO4H	noID	no ID
187.06	C8H10O5H	noID	no ID	6.94267e-06	9.08635e-06	0.000676521	0.000404647	3.14434e-06	0.000342282
187.075	C12H10O2H	noID	no ID
187.096	C9H14O4H	noID	no ID	8.56648e-12	1.47822e-12	0.000377734	0.000186562	3.876e-12	0.000190927
187.148	C14H18H	noID	no ID	8.97967e-05	3.35258e-05	0.000110054	0.000147108	4.36825e-05	5.98071e-05
187.206	C12H26OH	noID	no ID	1.19843e-11		5.3001e-05		5.69302e-12	2.81264e-05
189.091	C12H12O2H	noID	no ID	1.24934e-10		0.000787951		5.76283e-11	0.000406026
189.127	C13H16OH	noID	no ID
189.164	C14H20H	noID	no ID	0.000111707	2.32532e-05	1.12089e-05	1.94144e-05	5.40746e-05	6.06144e-06
190.086	C11H12NO2	noID	no ID	2.86531e-11		0.000101913		1.01545e-11	4.03475e-05
190.123	C12H15NOH	noID	no ID
191.055	C7H10O6H	noID	no ID
191.07	C11H10O3H	noID	no ID	4.93302e-07		0.000837459		2.24093e-07	0.00042499
191.107	C12H14O2H	noID	no ID	9.95054e-11		0.000726162		4.57168e-11	0.000372703
191.179	C14H22H	noID	no ID	0.000102593	6.96965e-05	0.000169094	0.000145242	4.94217e-05	9.09971e-05
193.05	C10H8O4H	noID	no ID
193.086	C11H12O3H	noID	no ID	2.6012e-11		0.000695341		1.17895e-11	0.000352062
193.122	C12H16O2H	noID	no ID
193.159	C13H20OH	noID	no ID	4.82337e-05	2.11679e-05	7.087e-05	9.12107e-05	2.26355e-05	3.71537e-05
193.195	C14H24H	noID	no ID	1.61672e-05	1.16954e-05	7.23611e-05	5.09513e-05	7.75071e-06	3.87536e-05
195.065	C10H10O4H	noID	no ID	4.55538e-11		0.000363893		2.04319e-11	0.00018233
195.102	C11H14O3H	noID	no ID	1.62778e-11	5.47039e-12	0.00105311	0.00029331	7.36066e-12	0.000531981
195.138	C12H18O2H	noID	no ID
195.174	C13H22OH	noID	no ID	6.99375e-06	6.21697e-06	8.29372e-05	5.17006e-05	3.26897e-06	4.33061e-05
195.211	C14H26H	noID	no ID
196.133	C11H17NO2H	noID	no ID	6.46154e-10	6.75975e-10	3.01011e-06	4.25693e-06	2.28513e-10	1.18921e-06
197.081	C10H12O4H	noID	no ID	2.26045e-11	1.74979e-11	0.000292126	4.21358e-05	1.01161e-11	0.000146046
197.132	C15H16H	noID	no ID
197.154	C12H20O2H	noID	no ID
197.19	C13H24OH	noID	no ID	4.61466e-06	3.11489e-06	6.18945e-05	4.45763e-05	2.14838e-06	3.21902e-05
197.226	C14H28H	noID	no ID	1.0572e-05	5.00801e-06	5.16767e-05	2.01657e-05	5.02039e-06	2.74142e-05
198.076	C9H11NO4H	noID	no ID
198.112	C10H15NO3H	noID	no ID
199.06	C9H10O5H	noID	no ID
199.075	C13H10O2H	noID	no ID
199.096	C10H14O4H	noID	no ID
199.112	C14H14OH	noID	no ID
199.148	C15H18H	noID	no ID
199.169	C12H22O2H	noID	no ID	7.70236e-06	9.989e-06	0.000369086	0.000128967	3.48372e-06	0.000186486
199.206	C13H26OH	noID	no ID	7.26618e-07	5.3899e-07	3.8953e-05	2.97441e-05	3.36947e-07	2.01788e-05
200.128	C10H17NO3H	noID	no ID
201.039	C8H8O6H	noID	no ID
201.076	C9H12O5H	noID	no ID
201.112	C10H16O4H	noID	no ID
201.127	C14H16OH	noID	no ID
201.164	C15H20H	noID	no ID
201.185	C12H24O2H	noID	no ID	6.78727e-12		0.000181569		3.05799e-12	9.13865e-05
203.07	C12H10O3H	noID	no ID
203.091	C9H14O5H	noID	no ID
203.179	C15H22H	noID	no ID	0.000218301	9.51589e-05	0.000230587	0.000404182	0.000102233	0.000120634
204.102	C12H13NO2H	noID	no ID
205.071	C8H12O6H	noID	no ID	1.95218e-09	2.72281e-09	0.000499283	0.00016579	8.58209e-10	0.0002452
205.086	C12H12O3H	noID	no ID	3.22286e-11		0.00072515		1.44043e-11	0.000362057
205.195	C15H24H	Sesquiterpenes	Sesquiterpenes	0.000430887	0.000398498	0.000409913	0.000648236	0.000745438	0.000792209
206.081	C11H11NO3H	noID	no ID
206.118	C12H15NO2H	noID	no ID
207.065	C11H10O4H	noID	no ID
207.102	C12H14O3H	noID	no ID
207.123	C9H18O5H	noID	no ID
207.211	C15H26H	noID	no ID	1.6137e-05	7.64218e-06	6.57631e-05	6.06015e-05	7.48892e-06	3.4094e-05
209.081	C11H12O4H	noID	no ID
209.154	C13H20O2H	noID	no ID	7.02837e-06		0.000119351		3.11871e-06	5.91625e-05
209.19	C14H24OH	noID	no ID	1.49029e-06	2.10706e-06	0.000161039	2.88386e-05	6.77811e-07	8.18217e-05
209.226	C15H28H	noID	no ID	2.55286e-06	1.39893e-06	2.54882e-05	7.21921e-06	1.17945e-06	1.31551e-05
210.149	C12H19NO2H	noID	no ID	9.18718e-07		1.02585e-10		3.23412e-07	4.0342e-11
211.096	C11H14O4H	noID	no ID	8.97721e-12	2.35304e-13	0.000217938	2.0475e-05	3.95429e-12	0.000107241
211.112	C15H14OH	noID	no ID
211.206	C14H26OH	noID	no ID	9.82209e-08	1.69735e-07	0.000108509	5.45929e-05	4.45032e-08	5.49228e-05
211.242	C15H30H	noID	no ID	1.21217e-05	5.08566e-06	4.92334e-05	3.75726e-05	5.5756e-06	2.52981e-05
a Ions having blank cells were not well fitted and have resulting residuals (= total measured signal - PMF synthetic signal) of higher than 50% in the 2-factor PMF solusions.
b Ions having blank cells correspond to primary, contaminant, and fragment ions, as well as ions which were not well fitted in the 2-factor PMF solutions.

## Sheet: Table S3
Table S3. Details of molar fractions of VOC contributions shown as normalized fractions (Figure 4).
(a) Fhigh-T = 100-80%, Flow-T = 0-20% (Figure 4a)				(b) Fhigh-T = 80-60%, Flow-T = 20-40% (Figure 4b)				(c) Fhigh-T = 60-40%, Flow-T = 40-60% (Figure 4c)				(d) Fhigh-T = 40-20%, Flow-T = 60-80% (Figure 4d)				(e) Fhigh-T = 20-0%, Flow-T = 80-100% (Figure 4e)
Elemental composition	Structure and functionality	Molar fraction (%)		Elemental composition	Structure and functionality	Molar fraction (%)		Elemental composition	Structure and functionality	Molar fraction (%)		Elemental composition	Structure and functionality	Molar fraction (%)		Elemental composition	Structure and functionality	Molar fraction (%)
HC (13.8%)	Aromatics with aliphatic alkenes	3.22		HC (40.0%)	Ethene (C2H4)	15.2745		HC (13.2%)	Aliphatic alkenes	10.6149		HC (0.7%)	no ID	0.718112		HC (0.8%)	no ID	0.803762
	PAHs	1.48			Other aliphatic alkenes	15.2276			Sesquiterpenes (C15H24)	0.258489		O1-HC (60.9%)	Methanol (CH4O)	39.7757		O1-HC (1.2%)	no ID	1.2167
	Monoterpenes (C10H16)	9.05			Isoprene (C5H8)	1.83451			no ID	2.34952			Aliphatic carbonyls	1.74186		O2-HC (12.3%)	Aliphatics	0.108723
	no ID	0.12			Non-substituted/alkyl benzenes	5.99657		O1-HC (36.4%)	Acetaldehyde (C2H4O)	13.8563			Aromatics	5.22091			Guaiacols	8.05792
O1-HC (3.1%)	Ehtanol	2.65			Aromatics with aliphatic alkenes	0.16102			Acrolein (C3H4O)	11.4219			Furans	11.8593			(Iso)eugenol	0.813016
	Oxygenated monoterpenes (C10H16O)	0.45			PAHs	0.0826024			aliphatic carbonyls + alkenes	5.66973			no ID	2.33534			no ID	3.27421
	no ID	0.04			no ID	1.42429			Aliphatic carbonyls	4.38667		O2-HC (30.0%)	Aliphatics	9.93816		O3-HC (7.5%)	Vanillin	1.21011
O3-HC (0.8%)	no ID	0.75		O1-HC (53.1%)	Formaldehyde (CH2O)	47.0574			Aromatics	0.826746			Aromatics	5.23418			Syringol	0.773524
O≥4-HC (0%)	-	0			Other aliphatic carbonyls	0.416501			Benzofurans	0.112982			Furans	8.78368			Furans	1.82913
N-HC (16.3%)	Hydrogen cyanide (HCN)	15.23			Aromatics	4.40776			no ID	0.0728002			no ID	5.99808			no ID	3.65318
	Aliphatic nitriles	0.94			Benzofurans	0.779882		O2-HC (47.0%)	Acetic acid/Glycolaldehyde	31.8954		O3-HC (6.9%)	Aliphatics	1.01945		O≥4-HC (3.0%)	Levoglucosan pyrolysis product	1.20094
	Pyrroles	0.03			no ID	0.47589			Aliphatic carbonyls	7.3267			Aromatics	0.579594			no ID	1.74624
	Pyridines	0.06		O2-HC (5.5%)	Aliphatics	4.37318			Other aliphatics	4.2838			Furans	5.07964		N-HC (74.2%)	Ammonia	73.6151
	no ID	0.02			Aromatics	1.13232			Aromatics	0.365329			no ID	0.186492			Other aliphatic amines	0.147351
N,O-HC (66.0%)	Isocyanic acid (HNCO)	33.13		O3-HC (0.1%)	Aliphatics	0.06			Furans	3.00375		O≥4-HC (0.2%)	no ID	0.154607			no ID	0.434182
	Nitrous acid (HONO)	30		O≥4-HC (0%)	-	0			no ID	0.167801		N-HC (0.1%)	Aliphatic nitriles	0.0269271		N,O-HC (0.8%)	Aliphatic nitros	0.00555348
	Alphatic nitros	2.62		N-HC (0.8%)	Aliphatic nitriles	0.323221		O3-HC (1.0%)	Furans	0.749712			Pyrroles	0.0152023			Aromatic nitros	0.0464303
	no ID	0.16			Aromatic nitriles	0.0488005			no ID	0.205953			Pyridines	0.0267695			no ID	0.740899
S-HC (0.1%)	Aliphatics	0.05			Pyrroles	0.440419		O≥4-HC (0.1%)	no ID	0.0824419			no ID	0.0420436		S-HC (0.1%)	no ID	0.0805241
Others (0%)	-	0		N,O-HC (0.3%)	Aliphatics	0.25		N-HC (2.1%)	Aliphatic nitriles	1.47638		N,O-HC (1.1%)	Aliphatics	0.581883		Others (0.2%)	no ID	0.242525
	Total	100		S-HC (0.2%)	Aliphatics	0.11			Alihatic amines	0.0980157			Aromatics	0.0344498			Total	100
					Tiophenes	0.07			Aromatic nitriles	0.147783			Furans	0.0177339
				Others (0.1%)		0.05			Pyrroles	0.141603			Pyridines	0.0989592
					Total	99.9965			Pyridines	0.186997			no ID	0.360778
								N,O-HC (0.3%)	Aliphatics	0.204983		S-HC (0.2%)	Tiophenes	0.17013
									Pyridines	0.0932721		Others (0%)	-	0
								S-HC (0%)	-	0			Total	100
								Others (0%)	-	0
									Total	100
